# Supplementary material for: Identification of epitope-based peptide vaccine candidates against enterotoxigenic Escherichia coli : a comparative genomics and immunoinformatics approach
Source: Royal Society of Chemistry journal article supplement (doi:10.1039/c5mb00745c), 2016-01-04
Supplement: c5mb00745c2.xlsx [file c5mb00745c2.xlsx]

## Sheet: Antigenicity>0.6
Uniprot Id	Potein Name	VaxiJen Score
A7ZGR5	Putative membrane protein	0.6034
A7ZVI4	Uncharacterized protein	0.7137
A7ZGR9	Uncharacterized protein	0.6476
A7ZQ75	Putative lipoprotein	0.8024
A7ZL38	Site-specific recombinase, phage integrase family	0.6063
A7ZRH4	Uncharacterized protein	0.639
A7ZVI2	Uncharacterized protein	0.6418
A7ZGK4	Uncharacterized protein	0.906
A7ZTH5	O-antigen polymerase	0.628

## Sheet: Membrane Proteins
Uniprot Id	Potein Name
A7ZGR5	Putative membrane protein
A7ZGK4	Uncharacterized protein
A7ZTH5	O-antigen polymerase

## Sheet: T-cell Epitopes
Protein	Epitope	NetCTL score	VaxiJen
A7ZGR5	KIENIIAFY	1.8303	-0.6404
	IIAFYEFMY	1.1235	1.6211
	FYEFMYINY	1.1529	1.1573
	YINYFTDFF	0.8544	-0.5986
	FTDFFLCLL	2.0921	0.2278
	TLLLGVLIY	1.0991	0.7237
	SLFGPEFLY	0.7607	1.5082
	KTALLICFF	0.9668	1.2435
	LICFFTLSY	1.8004	1.7024
	FTLSYNVLY	3.21	1.1549
	TLSYNVLYF	0.8201	0.9366
	FSYRVIVSY	1.1563	0.3525
	VSTTIHSLF	1.1339	0.7892
	STTIHSLFF	1.1339	1.2332
	PLNPLILLY	1.702	1.7194
	YYRFNDLFY	0.8111	0.7745
	PIVNLFLLY	1.0515	1.9812
	FLSFTQKTY	1.2307	-0.0295
	YSSTKNIHQ	0.935	0.8034
	GVVQVGLYY	1.2359	0.318
	TTDFFPDLL	1.9798	-0.1815
	VVFSENTVY	1.0445	-0.6966
	FSENTVYGF	1.2568	0.0483
	KASNAHQRY	1.4873	1.2538
	DINNIVSVY	1.0817	-0.2335
	KSDNELVIV	0.9552	-0.0712
	KLLDKNDMY	0.9649	-0.4323
	AVATNSLAY	2.5836	0.621
A7ZGK4	SVSVFIFLF	0.9647	3.0057
	SVFIFLFIY	1.0519	4.1539
	LMATVYTLV	0.8521	0.1208
	MVRACIQMY	0.8529	0.8009
A7ZTH5	AAGIISALY	1.3271	0.1242
	SGSVYTNAY	0.8957	0.425
	ASLATQLLF	0.7504	0.633
	SLATQLLFF	0.9629	0.7659
	AHAMWQHFY	0.7711	0.6354
	ASHATTAGY	1.5819	1.1027
	TTAGYIILF	1.6656	0.9246
	DLRHKTTLY	0.8614	-0.4196
	KTTLYTINF	0.8133	1.1789
	YTINFMLSL	0.9437	1.6805
	VTETRAAIL	0.8444	0.4305
	LILIVMDSY	0.8423	0.4161
	SVGARLAMY	0.955	1.0684
	LAFSAILIY	1.407	0.6401
	FSAILIYAL	0.7571	0.7841
	LSDVILFSK	0.7536	-1.0107
	ITIILLCAY	1.2989	0.4108
	QSDQCLLEK	1.3306	0.1261
